# Supplementary material
Source: Elsevier journal article supplement (https://www.sciencedirect.com/science/article/pii/S1575181318302146)
Supplement: mmc1 [file S1575181318302146:mmc1.pdf]

## **MATERIAL ADICIONAL**

### **ANEXO 1**

#### **CURSO ELECTIVO SOBRE CÁNCER**

**Título:** Actualización en cáncer.

**Forma organizativa:** Curso electivo.

**Dirigido a:** Estudiantes de 3ro, 4to y 5to año de la carrera de Medicina.

**Total de horas:** 66 horas.

**Duración:** Días hábiles.

**Frecuencias:** 10 horas semanales (7 semanas).

**Modalidad:** Presencial.

**Sede:** Facultad de Ciencias Médicas de Ciego de Ávila "Dr. José Assef Yara".

**Créditos:** No.

**Requisitos:** Encontrarse cursando la carrera de Medicina a partir del 5to semestre (3er año) en adelante.

#### **Objetivos generales del curso:**

1. Identificar los principales factores de riesgo que condicionan la aparición del cáncer y su progresión mediante la explicación de las bases genéticas y mecanismos bioquímicos-moleculares que intervienen en el proceso, sus manifestaciones clínicas, patológicas y métodos de diagnóstico precoz.
2. Ejecutar las audiencias sanitarias en centros de enseñanza primaria, secundaria, pre universitario, centros laborales de alto riesgo, hogares de ancianos y otros espacios de la comunidad para la promoción de hábitos y estilos de vida saludables en la prevención del cáncer.

**Invariante de contenido:** Núcleos de conocimientos: Promoción de hábitos y estilos de vida saludables dirigidos a la prevención del cáncer.

**Invariante de habilidad:** Ejecutar audiencias sanitarias en centros educativos y de trabajo dirigidas a la prevención del cáncer.

**Valores fundamentales del modelo del profesional de la carrera a los que tributa el curso:** Ética profesional, colectivismo, solidaridad, humanismo y responsabilidad, ante el desarrollo y ejecución de labores de promoción y prevención de salud como la audiencia sanitaria.

### **Plan temático**

**Tema 1:** “Generalidades de la oncología médica.”

#### **Objetivos:**

- Explicar las generalidades de los procesos oncoproliferativos definiendo el concepto de cáncer y tumores malignos.
- Caracterizar la evolución histórica del conocimiento de la enfermedad a nivel mundial, en Cuba y en la provincia Ciego de Ávila.

**Tema 2:** “Bases genéticas y moleculares que intervienen en el desarrollo del cáncer.”

#### **Objetivos:**

- Caracterizar los mecanismos bioquímicos y moleculares que intervienen en la producción del cáncer, así como sus bases genéticas.
- Identificar los tumores malignos más frecuentes en las diferentes edades con un importante componente genético.

**Tema 3:** “Caracterización clínica y anatómo-patológicas de los tumores malignos.”

#### **Objetivos:**

- Identificar los principales tipos de tumores malignos según su localización anatómica y diferenciarlos teniendo en cuenta el sexo, la edad y ocupación donde aparecen con mayor frecuencia.

- Caracterizar las manifestaciones clínicas generales y particulares de los tumores malignos según su localización y edades donde se presentan.

**Tema 4:** “Factores de riesgo que condicionan la aparición del cáncer y su prevención.

Hábitos y estilos de vida saludables”

**Objetivos:**

- Identificar los principales factores de riesgo modificables y no modificables que condicionan la aparición del cáncer.
- Explicar los mecanismos a través de los cuales los factores de riesgo intervienen en el desarrollo de los diferentes tipos de tumores malignos.
- Argumentar formas de estilos de vida saludables para prevenir la aparición del cáncer mediante la utilización de ejemplificaciones e ilustraciones.
- Exponer las recomendaciones generales de los organismos internacionales (OMS, FAO, OPS) para la alimentación y prevención de enfermedades crónicas.
- Elaborar mensajes educativos para la promoción de hábitos y estilos de vida saludables para la prevención de los diferentes tipos de cáncer.

**Tema 5:** “Programas y métodos de detección precoz de las enfermedades tumorales.”

**Objetivos:**

- Caracterizar los principales programas de detección precoz de los diferentes tipos de cáncer que actualmente se emplean en el mundo y en Cuba.
- Valorar los métodos de detección precoz del cáncer que se emplean en la Atención Primaria de Salud en Cuba.

**Tema 6:** “Generalidades sobre el tratamiento de los tumores malignos.”

**Objetivos:**

- Explicar las tendencias terapéuticas para el tratamiento de los diferentes tipos de cáncer que se emplean en el mundo y en Cuba.

**Tema 7:** “Directrices generales y habilidades comunicativas para el desarrollo de la audiencia sanitaria.”

**Objetivos:**

- Efectuar audiencias sanitarias para la prevención del cáncer mediante la promoción de hábitos y estilos de vida saludables en diferentes comunidades, centros estudiantiles y laborales.
- Elaborar mensajes comunicativos teniendo en cuenta las diferentes herramientas disponibles en la Atención Primaria de Salud.

TABLA. Distribución del fondo de tiempo por las diferentes formas organizativas docentes.

| <b>Temas</b>                                                                                  | <b>Conferencia</b> | <b>Clase Práctica</b> | <b>Trabajo Independiente</b> | <b>Total</b> |
|-----------------------------------------------------------------------------------------------|--------------------|-----------------------|------------------------------|--------------|
| Tema 1. Generalidades de la oncología médica.                                                 | 2 h                | 2 h                   | 4 h                          | 8 h          |
| Tema 2. Bases genéticas y moleculares que intervienen en el desarrollo del cáncer.            | 2 h                | 2 h                   | 4 h                          | 8 h          |
| Tema 3. Caracterización clínica y anatomo-patológicas de los tumores malignos.                | 2 h                |                       | 4 h                          | 6 h          |
| Tema 4. Factores de riesgo que condicionan la aparición del cáncer y su prevención. Hábitos y | 4 h                | 4 h                   | 8 h                          | 16 h         |

|                                                                                                         |      |      |      |      |
|---------------------------------------------------------------------------------------------------------|------|------|------|------|
| estilos de vida saludables.                                                                             |      |      |      |      |
| Tema 5. Programas y métodos de detección precoz de las enfermedades tumorales.                          | 2 h  | 2 h  | 4 h  | 8 h  |
| Tema 6. Generalidades sobre el tratamiento de los tumores malignos.                                     | 2 h  |      | 4 h  | 6 h  |
| Tema 7. Directrices generales y habilidades comunicativas para el desarrollo de la audiencia sanitaria. | 2 h  | 4 h  | 4 h  | 10 h |
| Evaluación                                                                                              |      |      |      | 4 h  |
| Total                                                                                                   | 14 h | 16 h | 32 h | 66 h |

**Fuente:** Plan temático del curso.

**Medios de enseñanza:** PC, Pizarra, Power Point por temas y Datashow.

**Sistema de evaluación: Evaluaciones sistemáticas:** Participación en conferencias y clases prácticas. **Evaluación final:** Constará de dos partes: en un primer momento los estudiantes se enfrentarán a un examen escrito (que constituye la pos prueba). En un segundo momento, un examen práctico donde los educandos desarrollarán audiencias sanitarias en centros de enseñanza primaria, secundaria y pre-universitaria, así como en centros laborales de alto riesgo y círculos de abuelos, expondrán los principales factores de

riesgo que se han asociado a la aparición de los diferentes tipos de cáncer en las edades pediátricas y adultas, los mecanismos genéticos, bioquímicos y moleculares por el cual actúan y promover hábitos y estilos de vida saludables que permiten prevenir el desarrollo de la enfermedad. La evaluación final será integral y cualitativa y se otorgará certificado de participación que será anexado al curriculum del estudiante.

**Organización, calendario y horario de las actividades:** El curso se impartirá a tiempo parcial dos veces a la semana durante siete semanas. Se replica dos veces al año.

### **Bibliografía Básica:**

- Acha T. Aspectos generales del cáncer en la infancia. En: Muños Hoyos A, Del Moral Romero E, Uberos Fernández J. Oncología infantil. Alcalá La Real (Jaén); Formación Alcalá; 2001.
- Álvarez Sintés R. Medicina General Integral. Tomo I. La Habana: Editorial Ciencias Médicas; 2014.
- Álvarez Sintés R. Medicina General Integral. Tomo II. La Habana: Editorial Ciencias Médicas; 2014.
- Álvarez Sintés R. Medicina General Integral. Tomo III. La Habana: Editorial Ciencias Médicas; 2014.
- Álvarez Sintés R. Medicina General Integral. Tomo IV. La Habana: Editorial Ciencias Médicas; 2014.
- Álvarez Sintés R. Medicina General Integral. Tomo V. La Habana: Editorial Ciencias Médicas; 2014.
- Bras J, Marquillas. Actividades de prevención y promoción de la salud en la infancia y la adolescencia. En: Martín Zurro A, Cano Pérez JF. Atención primaria. Problemas de salud en la consulta de medicina de familia [Internet]. Barcelona: Editorial Elsevier; 2014 [citado 10 Ene 2015]. Disponible en: <https://www.clinicalkey.es/#!/browse/book/3-s2.0-C20140004224>

- Ciurana Misol R, Brotons Cuixart C, Marzo Castillejo MM. Actividades de prevención y promoción de la salud en el adulto. En: Martín Zurro A, Cano Pérez JF. Atención primaria. Problemas de salud en la consulta de medicina de familia [Internet]. Barcelona: Editorial Elsevier; 2014 [citado 10 Ene 2015]. Disponible en: <https://www.clinicalkey.es#!/browse/book/3-s2.0-C20140004224>
- Fernández Mirabal A. Origen y desarrollo de la oncología en Cuba [Internet]. La Habana: Editorial Ciencias Médicas; 2011 [citado 2016 Ene 14]. Disponible en: [http://www.bvs.sld.cu/libros/origen\\_desarrollo\\_oncologia/origen\\_desarrollo\\_oncologia\\_completo.pdf](http://www.bvs.sld.cu/libros/origen_desarrollo_oncologia/origen_desarrollo_oncologia_completo.pdf)
- Fernández-Delgado Cerdá R, Donat Colomer J. Cáncer infantil. En: Díaz Rubio E, García-Conde J. Oncología Clínica Básica. Madrid; Arán Ediciones; 2000.

#### **Bibliografía Complementaria:**

- Bonet Gorbea M, Varona Pérez P. III Encuesta Nacional de factores de riesgo y actividades preventivas de enfermedades no transmisibles. Cuba 2010-2011. La Habana: Editorial Ciencias Médicas; 2015.  
Brito Hernández N, Villamil Fumero K, Galbán Noa T, Gómez Verano MR, Moreno González R, Llanes Gómez D. Evaluación del algoritmo para el control del cáncer de próstata en el Policlínico Universitario Área Norte de Ciego de Ávila. Año 2014. MEDICIEGO [revista en la Internet]. 2016 [citado 2015 Dic 10]; 22(3): 19-28. Disponible en: <http://www.medigraphic.com/pdfs/mediciego/mdc-2016/mdc163c.pdf>
- Calzadilla Estévez ME. Caracterización tomográfica del cáncer de pulmón con tomografía axial computarizada secuencial. 16 de Abril. 2015; 54(258): 83-94.
- Clapés Estapà J. La alimentación y sus alteraciones. En: Martín Zurro A, Cano Pérez JF. Atención primaria. Problemas de salud en la consulta de medicina de familia. Barcelona: Editorial Elsevier; 2014. Disponible en: <https://www.clinicalkey.es#!/browse/book/3-s2.0-C20140004224>
- F Cavalli. Cáncer. El Gran desafío. La Habana: Editorial Ciencias Médicas; 2012.

- Fernández-Plaza S, Sevilla J, Madero L. Tratamiento del cáncer en pediatría: estado actual y expectativas futuras. *Pediatr Integral* 2004; VIII (6):501-510.
- Ferrís Tortajada J, García Castell J, Berbel Tornero O. Dieta y cáncer pediátrico. *Rev Esp Pediatr* 2001; 57(1):75-92.
- Ortiz López DM, Hernández Hernández R, Estrada Espinosa EM, Duarte Vilariño A, Araujo Mejías M. Comportamiento clínico e histopatológico del adenocarcinoma de próstata incidental. *Mediciego* [revista en la Internet]. 2014 [citado 2015 Dic 10]; 20 (1). Disponible en: [www.medigraphic.com/pdfs/mediciego/mdc-2014/mdc141c.pdf](http://www.medigraphic.com/pdfs/mediciego/mdc-2014/mdc141c.pdf)
- Padilla Fernández AD, García Martín D, Rodríguez Valdés A, Banguela Marrero B, Sánchez García X. Conocimientos, percepción de riesgos y beneficios de la prueba citológica en mujeres del municipio Ciego de Ávila. *Mediciego* [revista en la Internet]. 2015 [citado 2015 Dic 10]; 21(1). Disponible en: <http://www.medigraphic.com/pdfs/mediciego/mdc-2015/mdc151f.pdf>
- Páez Ojeda L, Abogadro Díaz YG, Castellanos Vivancos L, Moré Rodríguez JC, Bello Ulloa L, Bringas Sosa Y. Comportamiento de factores pronósticos en la mortalidad por cáncer de pulmón en el municipio de Ciego de Ávila. *Mediciego* [revista en la Internet]. 2015 [citado 2015 Dic 10]; 21(2):66-74. Disponible en: <http://www.medigraphic.com/pdfs/mediciego/mdc-2015/mdc152j.pdf>
- Pérez Rizo Y, Pérez de Corcho Rodríguez MA, Pérez Assef JJ, Araujo Mejías M, Couse Herrera VM, González Cendán JM. Problemas relacionados con la neutropenia febril en las personas con cáncer. *Mediciego* [revista en la Internet]. 2014 [citado 2015 Dic 10]; 20 (1). Disponible en: <http://www.medigraphic.com/pdfs/mediciego/mdc-2014/mdc141h.pdf>
- Sosa Jiménez M, Sosa Jiménez M, Sola Maza E, Machado Espinosa Y. Validación de los indicadores de efectividad de la citología con aguja fina en las lesiones periféricas de pulmón. *Mediciego* [revista en la Internet]. 2016 [citado 2015 Dic 10]; 22(1):7-14. Disponible en: <http://www.medigraphic.com/pdfs/mediciego/mdc-2016/mdc161b.pdf>

**Fuente:** elaboración de los autores.
